# Supplementary material
Source: publisher figshare collection journal article supplement (https://rs.figshare.com/ndownloader/files/37467430)
Supplement: Supplementary file 1 [file 37467430]

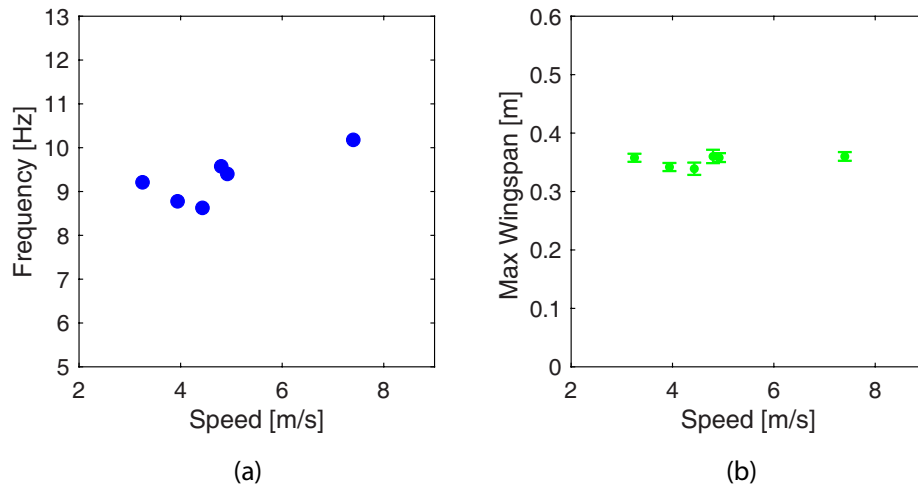

Figure S1: Wing kinematics as a function of speed. (a) Flapping frequency, defined by the up/down motion of the shoulder marker in body-fixed coordinate **B**. (b) Maximum wingspan is two times the greatest distance between the body sternum marker and the left wingtip. The vertical bar indicates one standard deviation of uncertainty resulting from a Monte Carlo randomization process.
